# Supplementary material
Source: PubMed Central journal article supplement (PMC1913853)

**A**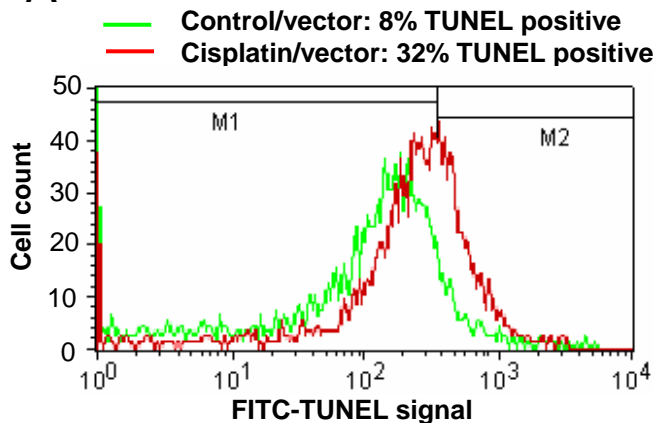**B**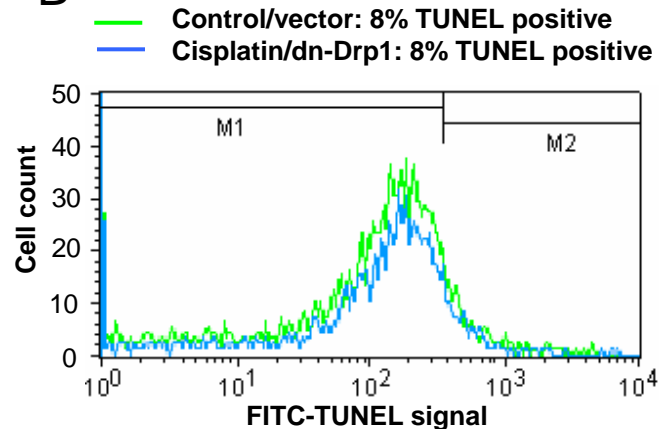**C**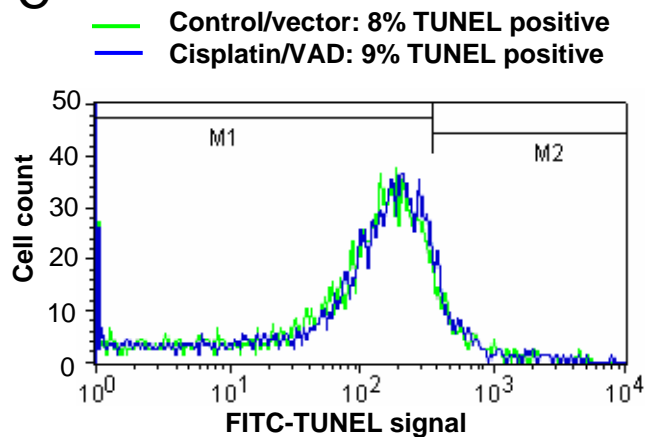**D**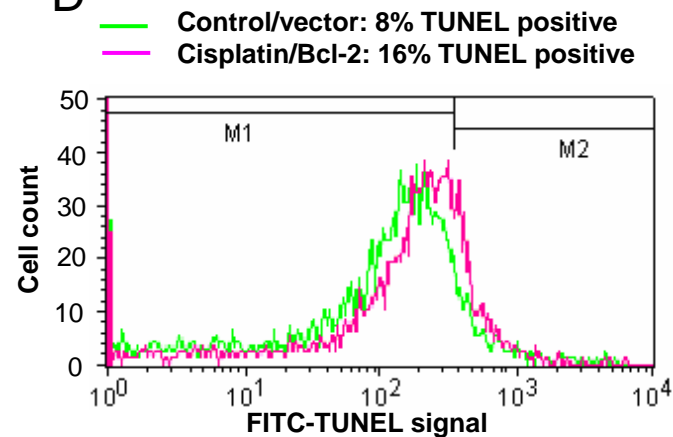

Supplement: pnas_0703976104_1.pdf [file pnas_0703976104_1.pdf]

**A**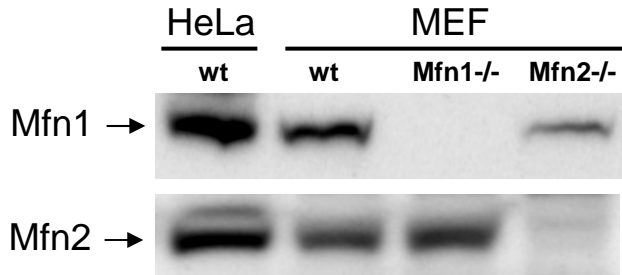**B**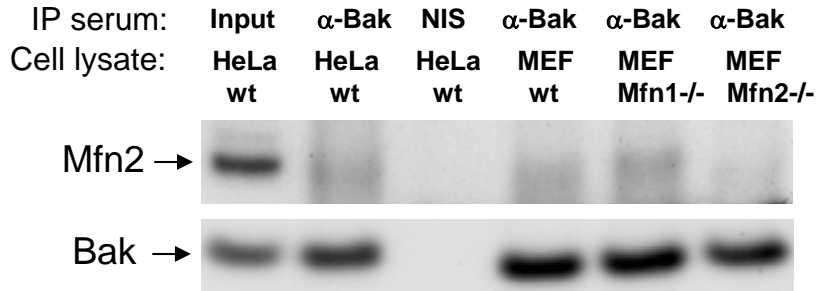

Supplement: pnas_0703976104_10.pdf [file pnas_0703976104_10.pdf]

**% FRET**

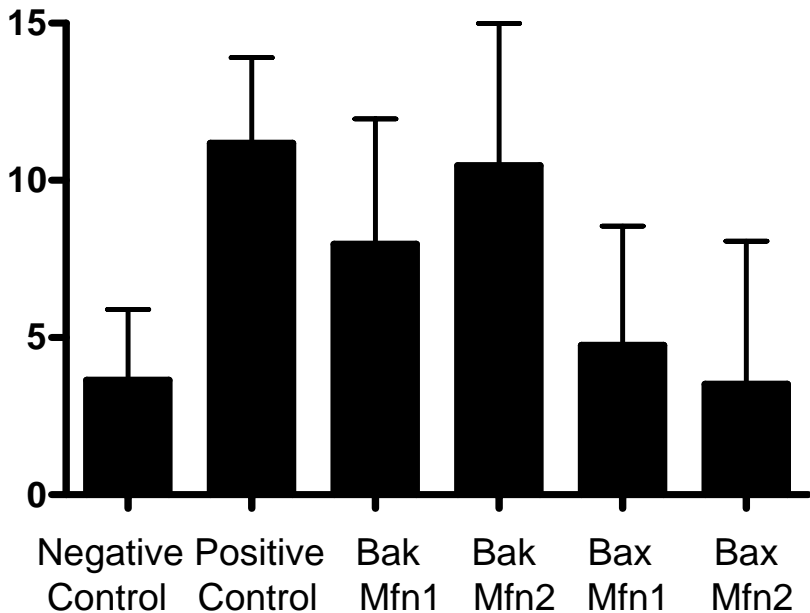

Supplement: pnas_0703976104_11.pdf [file pnas_0703976104_11.pdf]

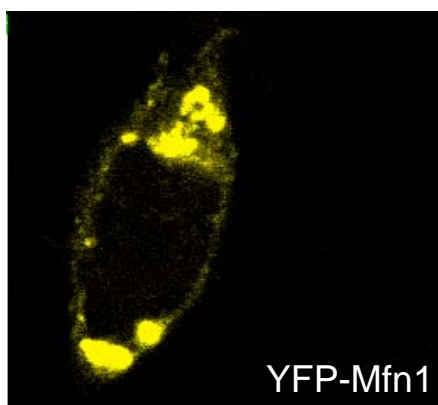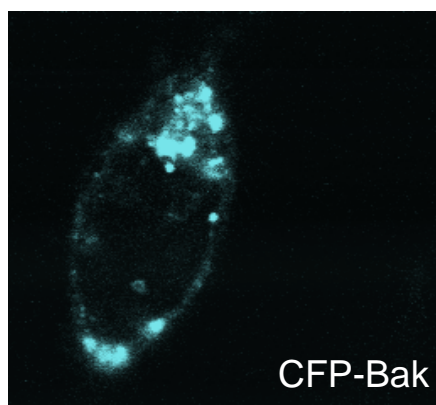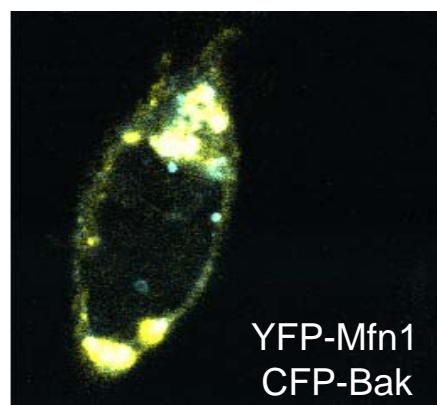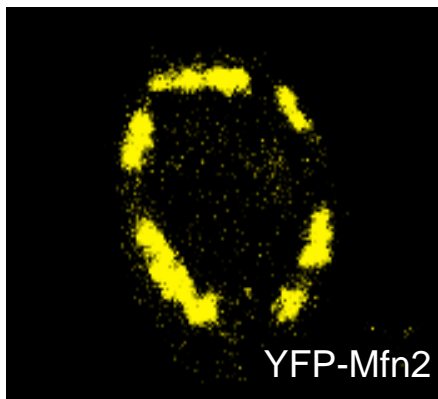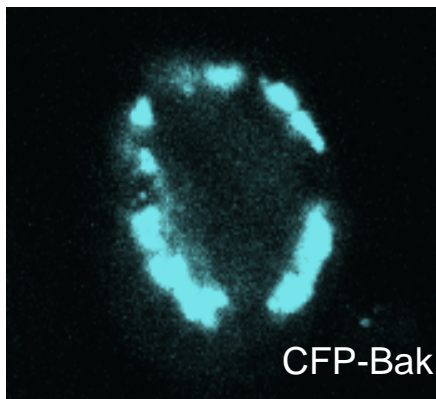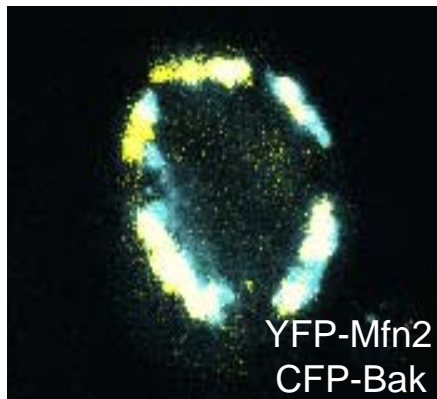

Supplement: pnas_0703976104_12.pdf [file pnas_0703976104_12.pdf]

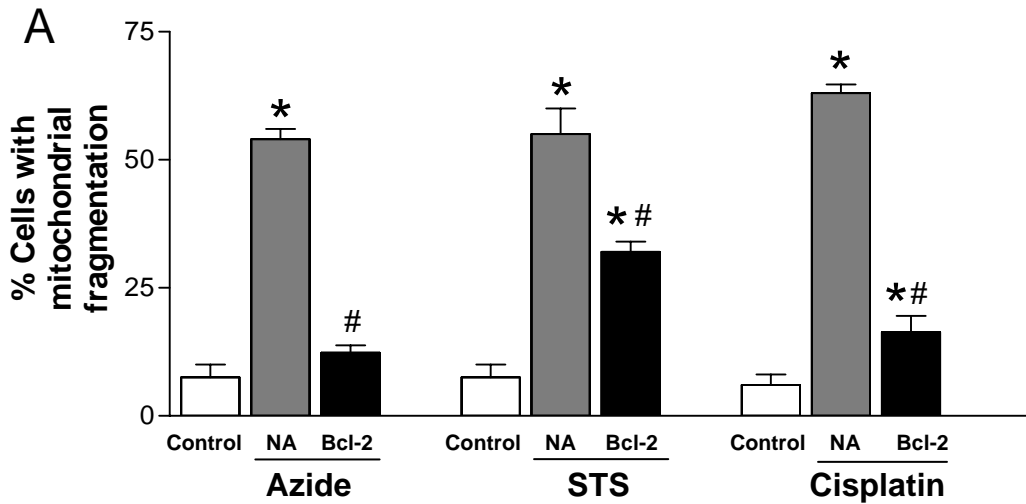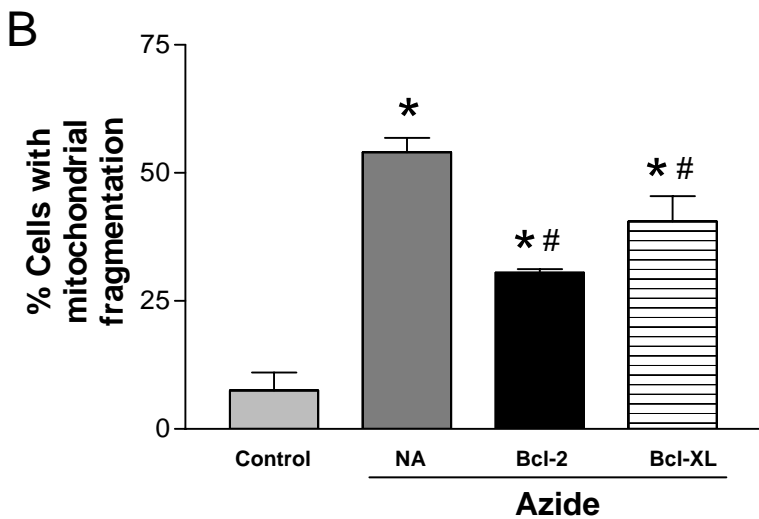

Supplement: pnas_0703976104_2.pdf [file pnas_0703976104_2.pdf]

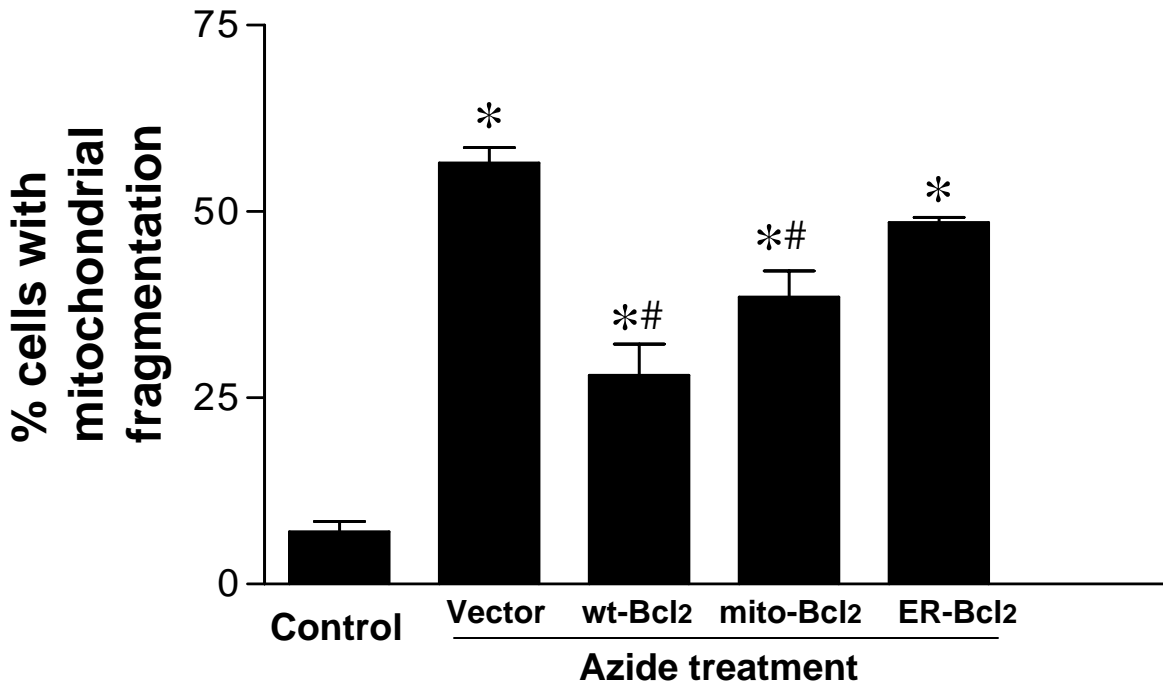

Supplement: pnas_0703976104_3.pdf [file pnas_0703976104_3.pdf]

**A**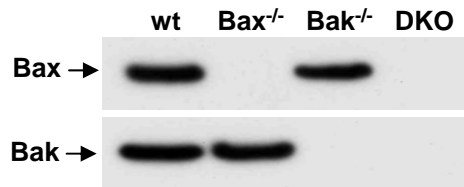**B**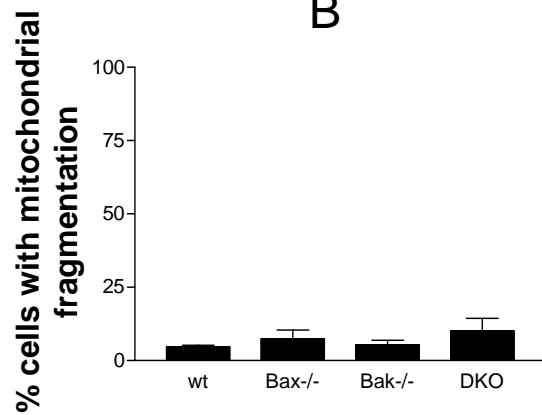**C**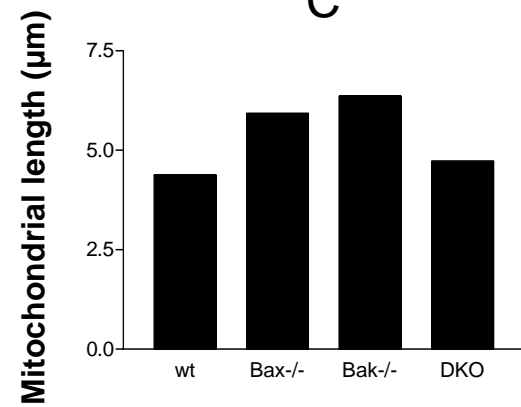**D**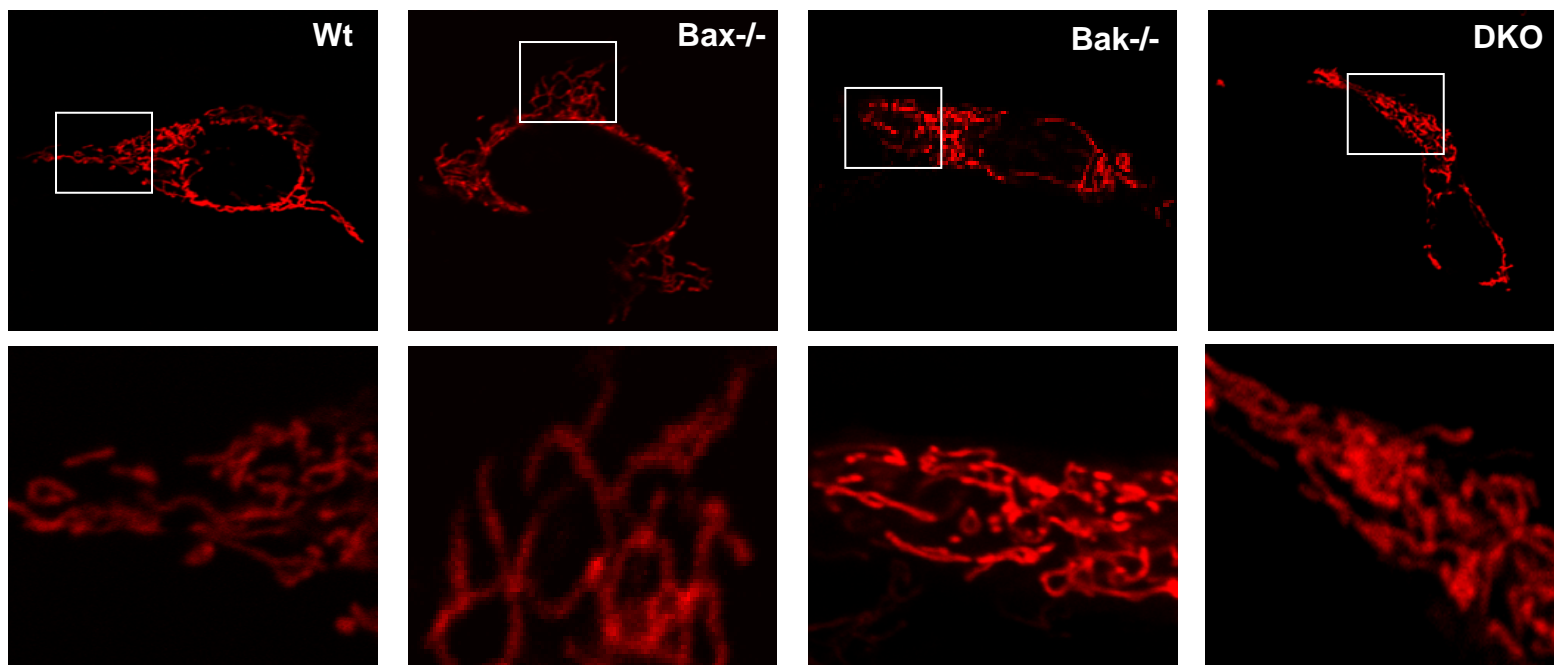

Supplement: pnas_0703976104_4.pdf [file pnas_0703976104_4.pdf]

**% Cells with  
mitochondrial  
fragmentation**

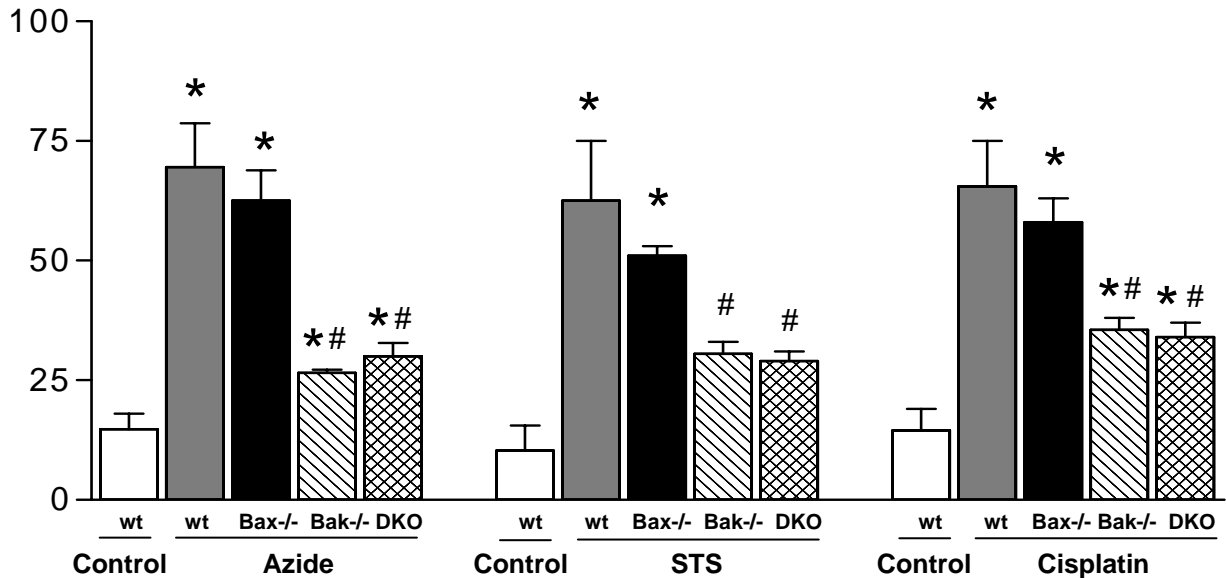

Supplement: pnas_0703976104_5.pdf [file pnas_0703976104_5.pdf]

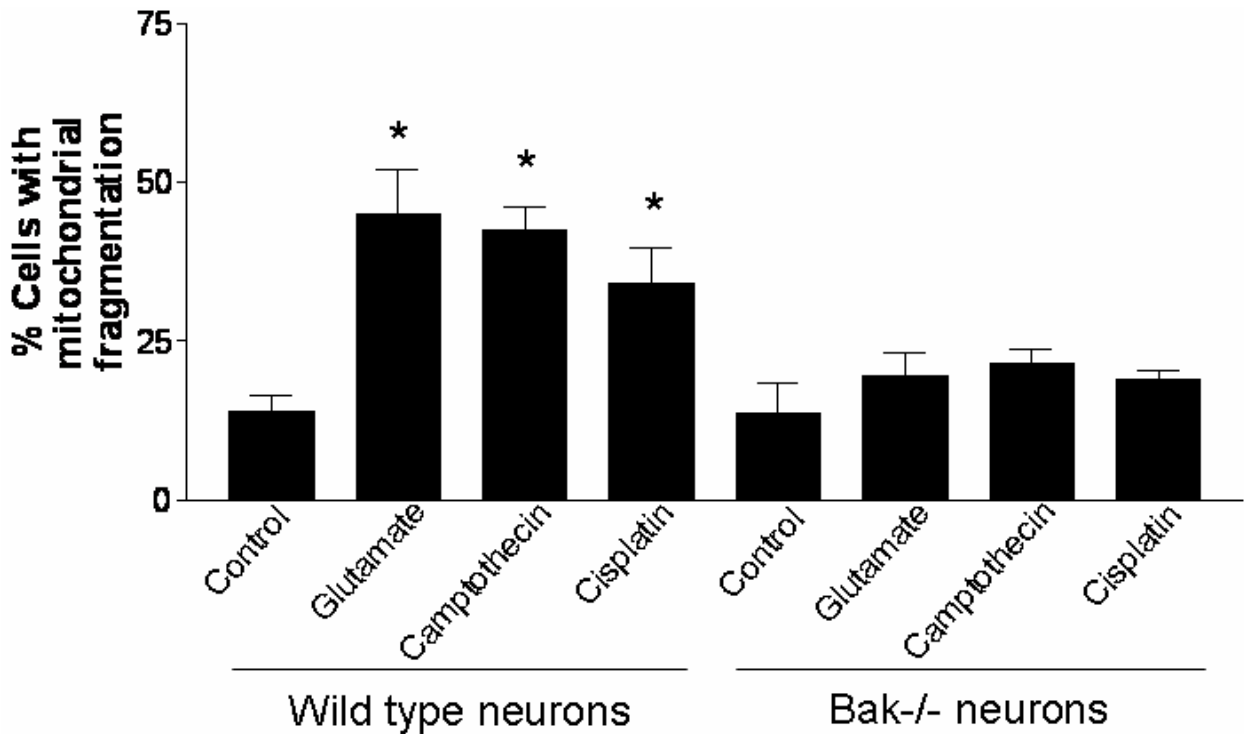

Supplement: pnas_0703976104_6.pdf [file pnas_0703976104_6.pdf]

% Cells

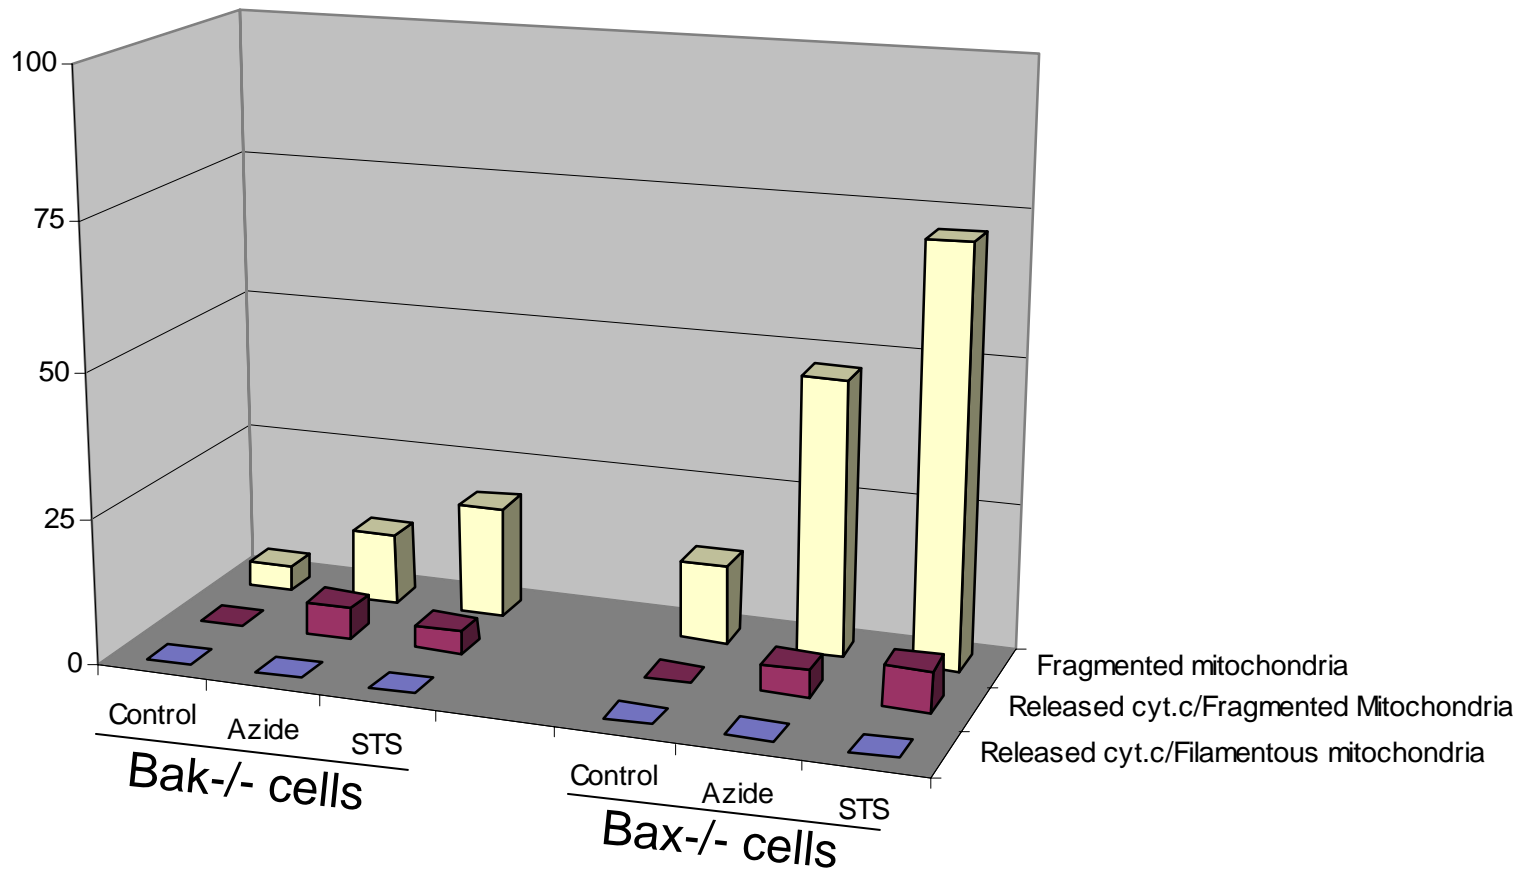

Supplement: pnas_0703976104_7.pdf [file pnas_0703976104_7.pdf]

**% Cells with mitochondrial  
fragmentation**

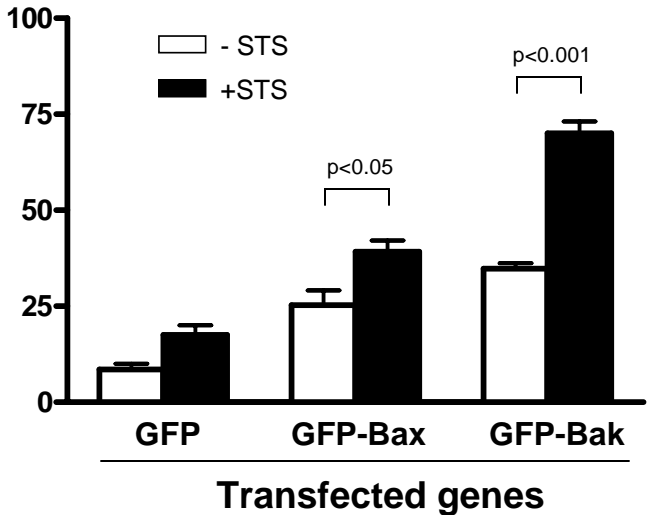

Supplement: pnas_0703976104_8.pdf [file pnas_0703976104_8.pdf]

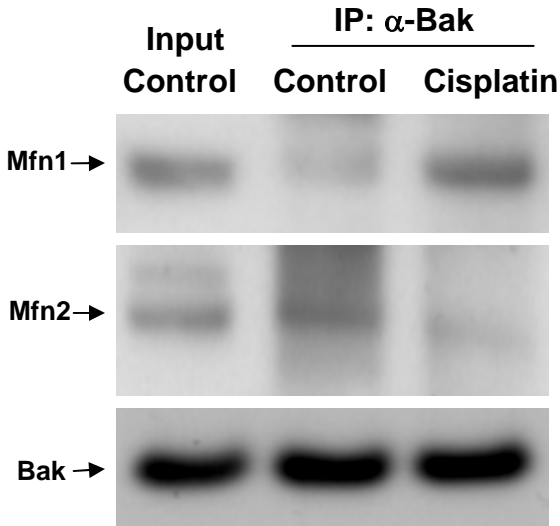

Supplement: pnas_0703976104_9.pdf [file pnas_0703976104_9.pdf]
